# Supplementary material
Source: PubMed Central journal article supplement (PMC6233766)
Supplement: jamapediatr-172-943-s001.pdf [file jamapediatr-172-943-s001.pdf]

## Supplementary Online Content

Salö M, Gudjonsdottir J, Omling E, Hagander L, Stenström P. Association of IgE-mediated allergy with risk of complicated appendicitis in a pediatric population. *JAMA Pediatr*. Published online August 6, 2018. doi:10.1001/jamapediatrics.2018.1634

**eFigure 1.** Adjusting for Sex in Multivariable Regression Model

**eFigure 2.** Adjusting for Primary Care Visits in Multivariable Regression

Model **eFigure 3.** Univariate Odds Ratios

**eFigure 4.** Adjusted Odds Ratios

**eMethods.** Evaluation of Heterogeneity

This supplementary material has been provided by the authors to give readers additional information about their work.

**eFigure 1. Adjusting for Sex in Multivariable Regression Model**

|                                          | Complicated disease<br>Less      More | Adjusted OR<br>(95% CI) | P Value |
|------------------------------------------|---------------------------------------|-------------------------|---------|
| Age (per year)                           |                                       | 0.83 (0.79-0.89)        | <.001   |
| Male                                     |                                       | 0.89 (0.60-1.33)        | .57     |
| Duration of symptoms (per day)           |                                       | 2.51 (2.05-3.07)        | <.001   |
| Appendicolith                            |                                       | 1.84 (1.07-3.16)        | .03     |
| Allergy                                  |                                       | 0.33 (0.18-0.59)        | <.001   |
| Pollen allergy <sup>a</sup>              |                                       | 0.29 (0.12-0.70)        | .006    |
| Fur or mite allergy <sup>b</sup>         |                                       | 0.25 (0.07-0.94)        | .04     |
| Egg or milk protein allergy <sup>c</sup> |                                       | 0.60 (0.16-2.29)        | .45     |
| Antibiotic allergy <sup>d</sup>          |                                       | 0.60 (0.21-1.71)        | .34     |
|                                          |                                       |                         |         |

Sex included in the multivariable regression model: Adjusted odds ratios and confidence intervals for complicated disease among 605 children operated for acute appendicitis.

<sup>a</sup> Pollen allergy versus no allergy. Pollen allergy includes allergies to allergens with cross-reactivity to pollen, <sup>b</sup> Fur or mite allergy versus no allergy,

<sup>c</sup> Egg or milk protein allergy versus no allergy, <sup>d</sup> Antibiotic allergy versus no allergy.

**eFigure 2. Adjusting for Primary Care Visits in Multivariable Regression Model**

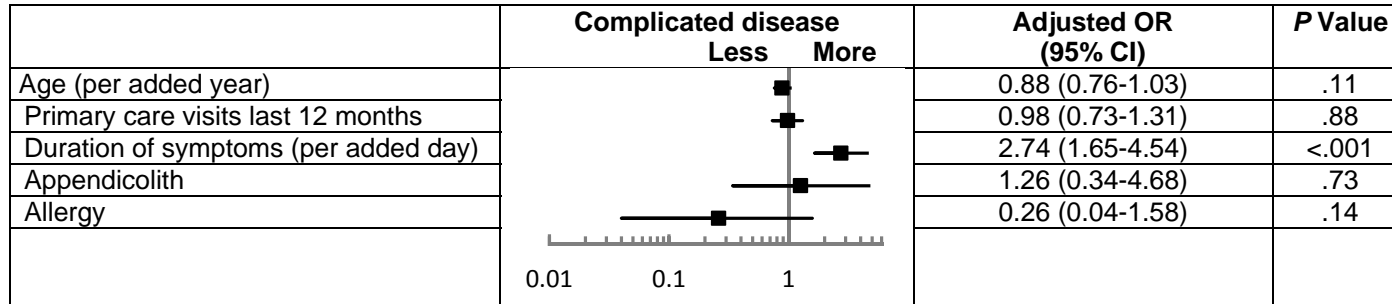

Number of primary care visits included in the multivariable regression model (N=95): Adjusted odds ratios and confidence intervals for complicated disease among 95 children operated on for acute appendicitis for whom data regarding primary care visits last 12 months were available.

### eFigure 3. Univariate Odds Ratios

#### A. PAD-verified diagnosis (n=340): Univariate odds ratios and confidence intervals for complicated disease among 340 children operated on for acute appendicitis for whom PAD-verified diagnosis was available

|                                                   | Uncomplicated (n=210)    | Complicated (n=130)     | Complicated disease<br>Less More | OR<br>(95% CI) | P<br>Value       |       |
|---------------------------------------------------|--------------------------|-------------------------|----------------------------------|----------------|------------------|-------|
| Gender                                            |                          |                         |                                  |                |                  |       |
| Boys <sup>a</sup>                                 | 144 (68.6% [61.8-74.8%]) | 74 (56.9% [48.0-65.6%]) |                                  |                | 0.61 (0.38-0.95) | .03   |
| Girls <sup>a</sup>                                | 66 (31.4% [25.2-38.2%])  | 56 (43.1% [34.4-52.0%]) |                                  |                |                  |       |
| Age (year) <sup>b</sup>                           | 11 [9-13]                | 8 [4-11]                |                                  |                | 0.79 (0.74-0.85) | <.001 |
| Duration of symptoms (days) <sup>b</sup>          | 1 [<1-1]                 | 2 [1-3]                 |                                  |                | 2.59 (2.04-3.30) | <.001 |
| Appendicolith <sup>a</sup>                        | 20 (9.5% [5.9-14.3%])    | 34 (26.2% [18.8-34.6%]) |                                  |                | 3.36 (1.84-6.16) | <.001 |
| Primary care visits last 12 months <sup>b,c</sup> | 0 [0-1]                  | 1 [0-3]                 |                                  |                | 1.25 (0.96-1.63) | .10   |
| Allergy <sup>a</sup>                              | 49 (23.3% [17.8-29.6%])  | 7 (5.4% [2.2-10.8%])    |                                  |                | 0.19 (0.08-0.43) | <.001 |
| Pollen allergy <sup>a</sup>                       | 28 (13.3% [9.0-18.7%])   | 3 (2.3% [0.5-6.7%])     |                                  |                | 0.14 (0.04-0.47) | .002  |
| Fur or mite allergy <sup>a</sup>                  | 13 (6.2% [3.3-10.4%])    | 1 (0.8% [0.0-4.2%])     |                                  |                | 0.10 (0.01-0.78) | .03   |
| Egg or milk protein allergy <sup>a</sup>          | 5 (2.4% [0.8-5.5%])      | 1 (0.8% [0.0-4.2%])     |                                  |                | 0.26 (0.03-2.27) | .22   |
| Antibiotic allergy <sup>a</sup>                   | 7 (3.3% [1.4-6.7%])      | 3 (2.3% [0.5-6.7%])     |                                  |                | 0.56 (0.14-2.21) | .41   |
|                                                   |                          |                         |                                  |                |                  |       |

<sup>a</sup> n (% [95% confidence interval]), <sup>b</sup> median [interquartile range], <sup>c</sup> Data available on 95 patients (available from 2015-2016).

**B. Clinical diagnosis only (n=264): Univariate odds ratios and confidence intervals for complicated disease among 264 children operated on for acute appendicitis for whom only clinical diagnosis was available**

|                                                    | Uncomplicated (n=138)   | Complicated (n=126)     | Complicated disease<br>Less    More | OR (95% CI)      | P Value |
|----------------------------------------------------|-------------------------|-------------------------|-------------------------------------|------------------|---------|
| Gender                                             |                         |                         |                                     |                  |         |
| Boys <sup>a</sup>                                  | 86 (62.3% [53.7-70.4%]) | 76 (60.3% [51.2-68.9%]) |                                     | 0.92 (0.56-1.51) | .74     |
| Girls <sup>a</sup>                                 | 52 (37.7% [29.6-46.3%]) | 50 (39.7% [31.1-48.8%]) |                                     | 0.82 (0.76-0.89) | <.001   |
| Age (year) <sup>b</sup>                            | 11 [8-12]               | 9 [4-11]                |                                     | 2.98 (2.16-4.10) | <.001   |
| Duration of symptoms (days) <sup>b</sup>           | 1 [<1-1]                | 1 [1-3]                 |                                     | 2.77 (1.39-5.51) | .004    |
| Appendicolith <sup>a</sup>                         | 14 (10.1% [5.7-16.4%])  | 30 (23.8% [16.7-32.2%]) |                                     | 1.53 (0.79-2.97) | .21     |
| Primary care visits last 12 months <sup>b, c</sup> | 0 [0-2]                 | 1 [0-2]                 |                                     | 0.37 (0.18-0.73) | .005    |
| Allergy <sup>a</sup>                               | 33 (23.9% [17.1-31.9%]) | 13 (10.3% [5.6-17.0%])  |                                     | 0.23 (0.08-0.72) | .01     |
| Pollen allergy <sup>a</sup>                        | 16 (11.6% [6.8-18.1%])  | 14 (3.2% [0.9-7.9%])    |                                     | 0.37 (0.07-1.96) | .24     |
| Fur or mite allergy <sup>a</sup>                   | 5 (3.6% [1.2-8.3%])     | 2 (1.6% [0.2-5.6%])     |                                     | 0.70 (0.15-3.19) | .64     |
| Egg or milk protein allergy <sup>a</sup>           | 4 (2.9% [0.8-7.3%])     | 3 (2.4% [0.5-6.8%])     |                                     | 0.66 (0.20-2.16) | .50     |
| Antibiotic allergy <sup>a</sup>                    | 7 (5.1% [2.1-10.2%])    | 5 (4.0% [1.3-9.0%])     |                                     |                  |         |

<sup>a</sup> n (% [95% confidence interval]), <sup>b</sup> median [interquartile range], <sup>c</sup> Data available on 95 patients (available from 2015-2016).

**eFigure 4. Adjusted Odds Ratios**

**A. PAD-verified diagnosis (n=340): Adjusted odds ratios and confidence intervals for complicated disease among 340 children operated on for acute appendicitis for whom PAD-verified diagnosis was available**

|                                          | Complicated disease |      | Adjusted OR<br>(95% CI) | P Value |
|------------------------------------------|---------------------|------|-------------------------|---------|
|                                          | Less                | More |                         |         |
| Age (per added year)                     |                     |      | 0.84 (0.77-0.91)        | <.001   |
| Duration of symptoms (per added day)     |                     |      | 2.39 (1.84-3.10)        | <.001   |
| Appendicolith                            |                     |      | 1.91 (0.94-3.88)        | .07     |
| Allergy                                  |                     |      | 0.23 (0.09-0.56)        | .001    |
| Pollen allergy <sup>a</sup>              |                     |      | 0.20 (0.06-0.73)        | .02     |
| Fur or mite allergy <sup>b</sup>         |                     |      | 0.15 (0.02-1.26)        | .08     |
| Egg or milk protein allergy <sup>c</sup> |                     |      | 0.31 (0.03-3.11)        | .32     |
| Antibiotic allergy <sup>d</sup>          |                     |      | 0.59 (0.41-2.55)        | .51     |
|                                          |                     |      |                         |         |

<sup>a</sup> Pollen allergy versus no allergy. Pollen allergy includes allergies to allergens with cross-reactivity to pollen. <sup>b</sup> Fur or mite allergy versus no allergy, <sup>c</sup> Egg or milk protein allergy versus no allergy, <sup>d</sup> Antibiotic allergy versus no allergy.

**B. Clinical diagnosis only (n=264): Adjusted odds ratios and confidence intervals for complicated disease among children operated on for acute appendicitis for whom only clinical diagnosis was available**

|                                          | Complicated disease<br>Less More | Adjusted OR<br>(95% CI) | P Value |
|------------------------------------------|----------------------------------|-------------------------|---------|
| Age (per added year)                     |                                  | 0.84 (0.77-0.92)        | <.001   |
| Duration of symptoms (per added day)     |                                  | 2.83 (2.03-3.96)        | <.001   |
| Appendicolith                            |                                  | 1.80 (0.78-4.16)        | .17     |
| Allergy                                  |                                  | 0.45 (0.20-1.02)        | .06     |
| Pollen allergy <sup>a</sup>              |                                  | 0.46 (0.14-1.57)        | .22     |
| Fur or mite allergy <sup>b</sup>         |                                  | 0.44 (0.07-2.77)        | .38     |
| Egg or milk protein allergy <sup>c</sup> |                                  | 0.93 (0.16-5.37)        | .94     |
| Antibiotic allergy <sup>d</sup>          |                                  | 0.55 (0.13-2.29)        | .41     |
|                                          |                                  |                         |         |

<sup>a</sup> Pollen allergy versus no allergy. Pollen allergy includes allergies to allergens with cross-reactivity to pollen, <sup>b</sup> Fur or mite allergy versus no allergy, <sup>c</sup> Egg or milk protein allergy versus no allergy, <sup>d</sup> Antibiotic allergy versus no allergy.

## **eMethods. Evaluation of Heterogeneity**

**1. Interaction between age and occurrence of allergy:**

Test of heterogeneity for interaction between age at appendicitis and occurrence of allergy:  $p=0.68$ . There is no evidence of significant effect modification.

**2. Interaction between occurrence of allergy and medication:**

Test of heterogeneity for interaction between occurrence of allergy and medication for allergy:  $p=0.22$ . There is no evidence of significant effect modification.

**3. Interaction between occurrence of seasonal allergy (pollen allergy) and season:**

Test of heterogeneity for interaction between pollen allergy and time of year:  $p=0.83$ . There is no evidence of significant effect modification.
